# Supplementary material for: 40 Hz Light Flicker Alters Human Brain Electroencephalography Microstates and Complexity Implicated in Brain Diseases
Source: PubMed Central journal article supplement (PMC8710722; doi:10.3389/fnins.2021.777183), 2021-12-13

## Supplementary Material

# 40 Hz Light Flicker Alters Human Brain Electroencephalography Microstates and Complexity Implicated in Brain Diseases

Yiqi Zhang<sup>1#</sup>, Zhenyu Zhang<sup>1#</sup>, Lei Luo<sup>1</sup>, Huaiyu Tong<sup>2</sup>, Fei Chen<sup>3</sup>, Sheng-Tao Hou<sup>1\*</sup>

<sup>1</sup> Brain Research Centre and Department of Biology, Southern University of Science and Technology, Shenzhen, China,

<sup>2</sup> Department of Neurosurgery, The First Medical Center, Chinese PLA General Hospital, Beijing, China,

<sup>3</sup> Department of Electrical and Electronic Engineering, Southern University of Science and Technology, Shenzhen, China

**Supplementary Figure 1** | Percent power changes between 40 Hz and total power in position O of all test subjects. (A) is relative to random light flicker, while (B) is relative to 40 Hz light stimulation.

# Figure S1

A Relative Power Change at Position O: Response to Random Flicker

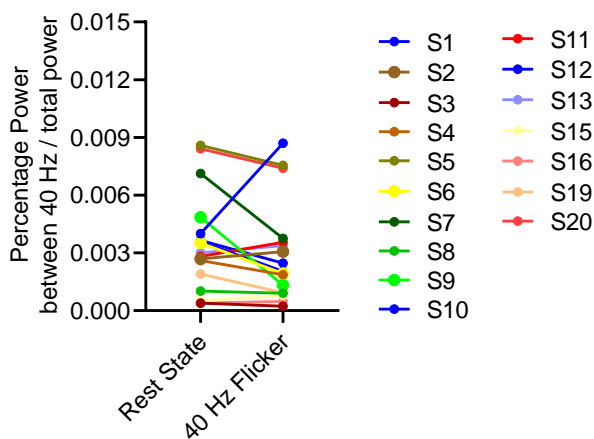

B Relative Power Change at Position O: Response to 40 Hz Flicker

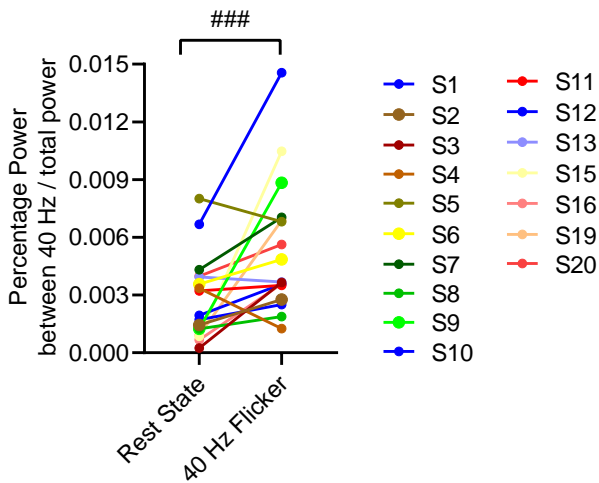

Supplement: Data_Sheet_1.pdf [file Data_Sheet_1.pdf]
